# Supplementary material for: Use of viability PCR for detection of live Chlamydia trachomatis in clinical specimens
Source: Frontiers journal article supplement (doi:10.3389/frph.2023.1199740), 2023-08-04
Supplement: Data_Sheet_1.PDF [file Data_Sheet_1.PDF]

| sample | IFU/mL | total DNA copies<br>per mL | viable<br>DNA<br>copies<br>per mL |
|--------|--------|----------------------------|-----------------------------------|
| 1      | 250    | 6500                       | 800                               |
| 2      | 21000  | 257000                     | 66000                             |
| 3      | 127500 | 2242500                    | 85000                             |
| 4      | 4400   | 243500                     | 109000                            |
| 5      | 163000 | 5360000                    | 987500                            |
| 6      | 204000 | 19125000                   | 831000                            |
| 7      | 5440   | 604500                     | 114500                            |
| 8      | 188000 | 818000                     | 692500                            |
| 9      | 3740   | 161500                     | 3750                              |
| 10     | 24600  | 4330500                    | 268500                            |
| 11     | 6400   | 3770500                    | 62500                             |
| 12     | 21250  | 1531000                    | 262500                            |
| 13     | 10880  | 1502000                    | 118000                            |
| 14     | 1000   | 64500                      | 4400                              |
| 15     | 12240  | 1069500                    | 245500                            |
| 16     | 340    | 293000                     | 110000                            |
| 17     | 188000 | 38150000                   | 4291000                           |
| 18     | 10     | 20350                      | 0                                 |

**Supplemental Table 1: Culture, digital total DNA, and digital vPCR results for vaginal swabs.** Vaginal swabs were thawed, diluted and cultured to calculate inclusion-forming units as described in the materials and methods. Samples for PCR were split, one was viability treated, then both viability treated and total DNA was assayed for *ompA* by digital PCR. Copies per mL of original sample are reported.

| PTID | Culture outcome | Viability PCR        | Concordance     |
|------|-----------------|----------------------|-----------------|
| 1    | Negative        | ND                   | NEGATIVE        |
| 2    | Negative        | t = 417, v = 1125    | vPCR+           |
| 3    | Negative        | ND                   | NEGATIVE        |
| 4    | Negative        | ND                   | NEGATIVE        |
| 5    | Negative        | t = 375, v = 167     | vPCR+           |
| 6    | Negative        | t = 688, v = 417     | vPCR+           |
| 7    | Positive        | t = 13,833, v = 4167 | POSITIVE        |
| 8    | Positive        | t = 979, V = 667     | POSITIVE        |
| 9    | Negative        | t = 3167, v = 667    | vPCR+           |
| 10   | Positive        | t = 9729, v = 6667   | POSITIVE        |
| 11   | Positive        | t = 5479, v = 542    | POSITIVE        |
| 12   | Contaminated    | ND                   | ND              |
| 13   | Negative        | ND                   | NEGATIVE        |
| 14   | Contaminated    | t = 2604, v = ND     | ND              |
| 15   | Negative        | t = 396, v = 292     | vPCR+           |
| 16   | Negative        | t = 271, v = 271     | vPCR +          |
| 17   | Negative        | ND                   | NEGATIVE        |
| 18   | Negative        | t = 2208, v = 292    | vPCR+           |
| 19   | Negative        | t = 5396             | total DNA+ only |
| 20   | Negative        | ND                   | NEGATIVE        |
| 21   | Negative        | ND                   | NEGATIVE        |
| 22   | Negative        | ND                   | NEGATIVE        |
| 23   | Negative        | ND                   | NEGATIVE        |
| 24   | Negative        | ND                   | NEGATIVE        |
| 25   | Negative        | ND                   | NEGATIVE        |
| 26   | Negative        | ND                   | NEGATIVE        |
| 27   | Contaminated    | ND                   | ND              |
| 28   | Negative        | ND                   | NEGATIVE        |
| 29   | Negative        | t = 250, v = 541     | vPCR+           |
| 30   | Negative        | t = 1417, v = 146    | vPCR+           |
| 31   | Negative        | ND                   | NEGATIVE        |
| 32   | Positive        | t = 2083, v = 3042   | Positive        |

**Supplemental Table 2: Culture and PCR results from rectal swabs.** Rectal swabs were tested twice in culture assay, results are from either one or both tests. Samples for PCR were split, one was viability treated, then both viability treated and total DNA was assayed for ompA by digital PCR. Copies per mL of original sample are reported T = total DNA, v = viable DNA, ND = not detected. Last column "Concordance" reports agreement between culture and PCR results, ND = not determined
